# Supplementary material for: The Genomic and Epigenomic Landscape of Double-Negative Metastatic Prostate Cancer
Source: PubMed Central journal article supplement — Cancer Res. 2023 Jun 8;83(16):2763–74. doi: 10.1158/0008-5472.CAN-23-0593 (PMC10425725; doi:10.1158/0008-5472.can-23-0593), 2023-06-08
Supplement: can-23-0593_supplementary_figure_1.suppsf1.pdf [file can-23-0593_supplementary_figure_1.suppsf1.pdf]

# Supplementary Figure 1.

A

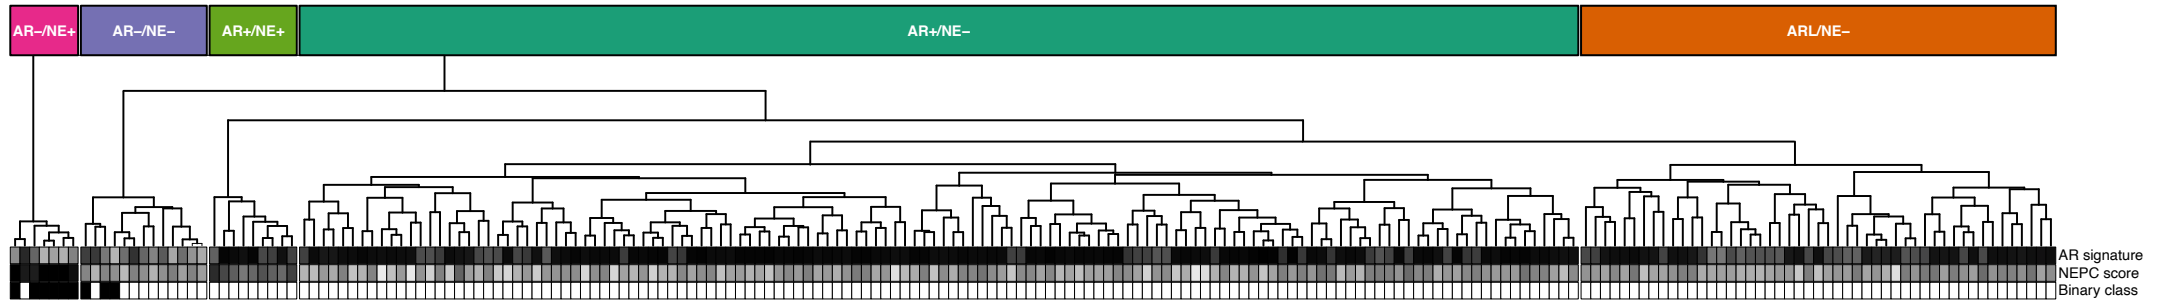

B

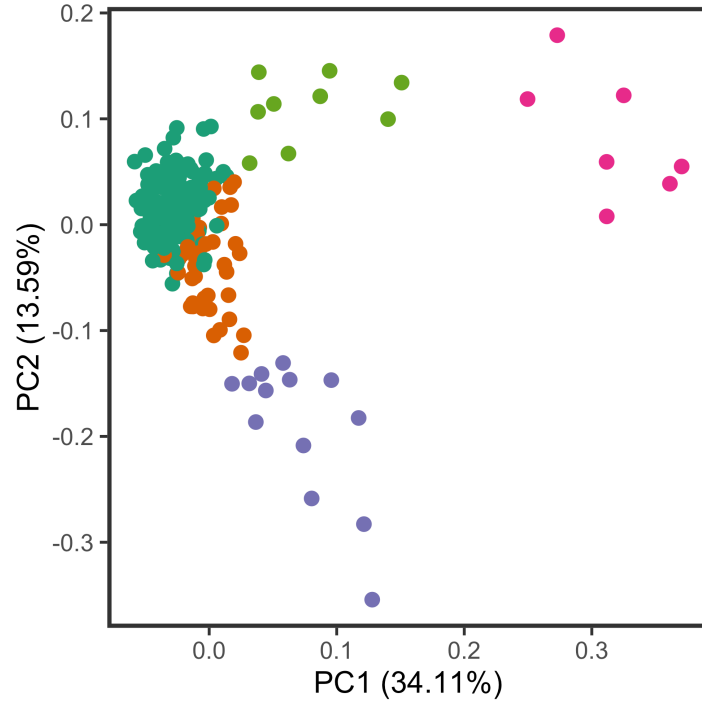

C

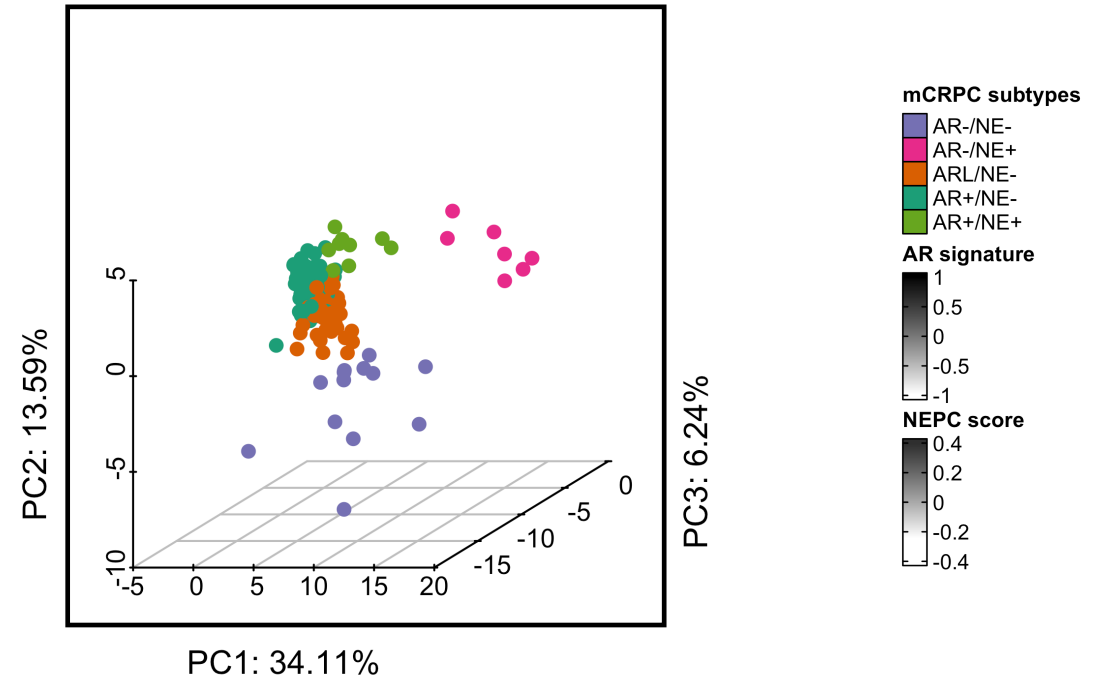

**Supplementary Figure 1. Hierarchical clustering and principal component analyses (PCA) on the mCRPC tumors of WCDT cohort.**

A) Hierarchical clustering, B) PCA in 2-dimensions and C) 3-dimensions on the mCRPC tumors from WCDT. Tumors are colored according to their androgen and neuroendocrine status.
