# Supplementary material for: The Genomic and Epigenomic Landscape of Double-Negative Metastatic Prostate Cancer
Source: PubMed Central journal article supplement — Cancer Res. 2023 Jun 8;83(16):2763–74. doi: 10.1158/0008-5472.CAN-23-0593 (PMC10425725; doi:10.1158/0008-5472.can-23-0593), 2023-06-08
Supplement: can-23-0593_supplementary_figure_2.suppsf2.pdf [file can-23-0593_supplementary_figure_2.suppsf2.pdf]

## Supplementary Figure 2.

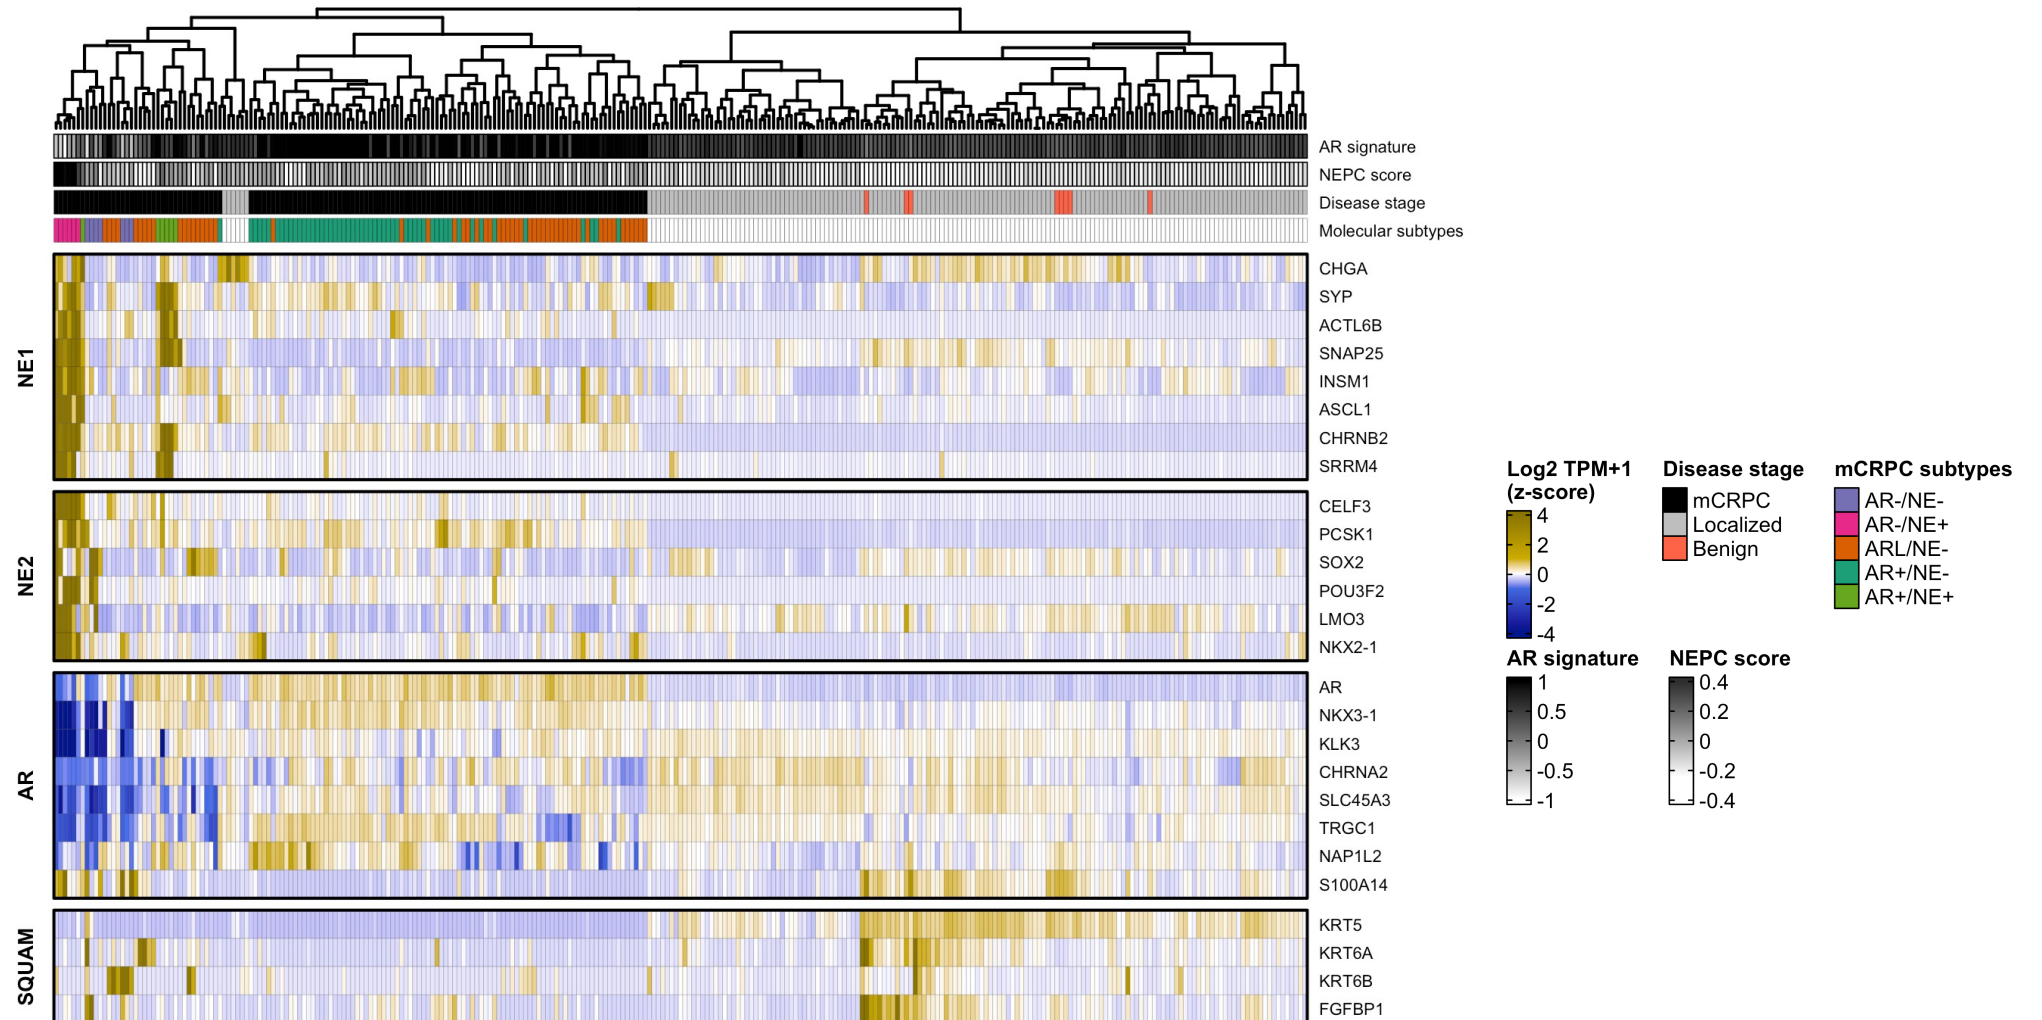

**Supplementary Figure 2. Hierarchical clustering analyses of benign, localized, and mCRPC tumors representing the expression of neuroendocrine marker genes (NE), androgen-related genes (AR), and genes related to squamous (SQUAM) differentiation.**

Heatmap showing gene expression levels Log2 TPM+1 (z-score) of genes in NE1, NE2, AR and SQUAM gene panels in 8 benign (in red), 148 localized (in gray) and 210 mCRPC (in black) tumors using hierarchical clustering analyses. Column distances were calculated using Pearson's method.
