# Supplementary material for: The Genomic and Epigenomic Landscape of Double-Negative Metastatic Prostate Cancer
Source: PubMed Central journal article supplement — Cancer Res. 2023 Jun 8;83(16):2763–74. doi: 10.1158/0008-5472.CAN-23-0593 (PMC10425725; doi:10.1158/0008-5472.can-23-0593), 2023-06-08
Supplement: can-23-0593_supplementary_figure_3.suppsf3.pdf [file can-23-0593_supplementary_figure_3.suppsf3.pdf]

# Supplementary Figure 3.

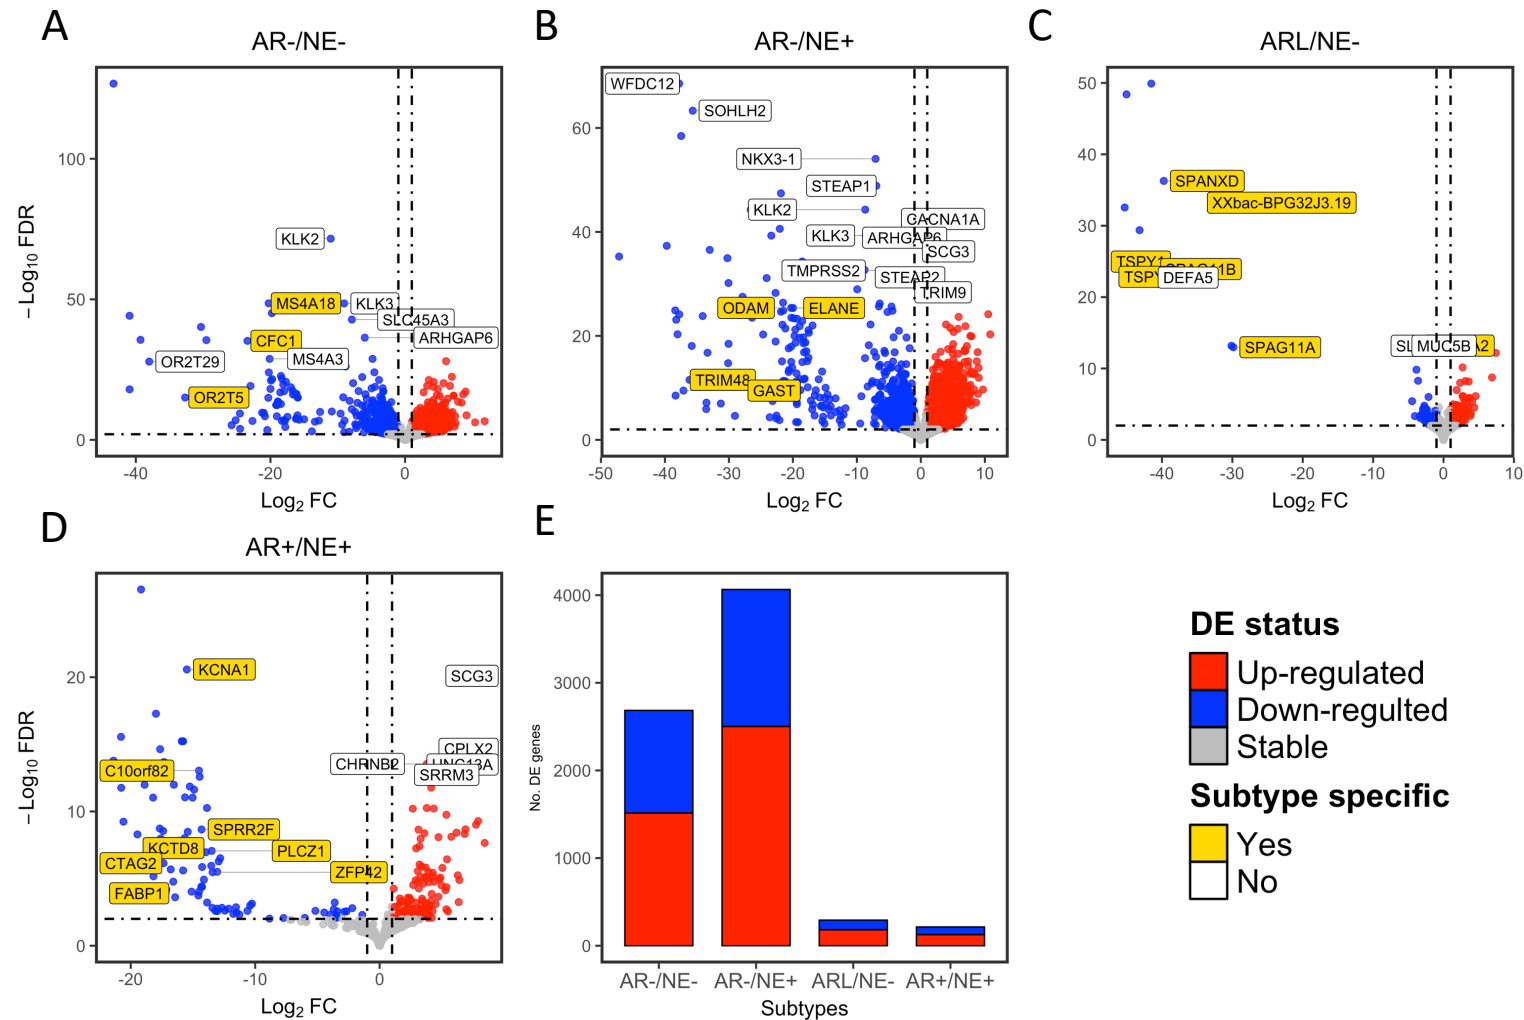

**Supplementary Figure 3. Volcano plots representing the differentially expressed (DE) genes in the mCRPC subtypes compared to AR+/NE- tumors.**

Volcano plots representing DE genes in A) AR-/NE-, B) AR-/NE+, C) ARL/NE-, D) AR+/NE+ tumors compared to AR+/NE- subtype. E) Bar-plots represent the total number of up- or down-regulated genes within each subtype. Red and blue colors represent up- or down-regulated genes in each subtype, gray color indicates genes with no-change in expression. Yellow boxes show genes that are unique to each subtype. Horizontal dashed line indicates  $FDR \leq 0.01$ , vertical black dashed lines indicate fold-change (FC) of  $\pm 2$ . Shrinkage LogFC was used to estimate accurate LFC values close to zero; data was corrected for tumor purity and tumor ploidy.
