# Supplementary material for: The Genomic and Epigenomic Landscape of Double-Negative Metastatic Prostate Cancer
Source: PubMed Central journal article supplement — Cancer Res. 2023 Jun 8;83(16):2763–74. doi: 10.1158/0008-5472.CAN-23-0593 (PMC10425725; doi:10.1158/0008-5472.can-23-0593), 2023-06-08
Supplement: can-23-0593_supplementary_figure_4.suppsf4.pdf [file can-23-0593_supplementary_figure_4.suppsf4.pdf]

# Supplementary Figure 4.

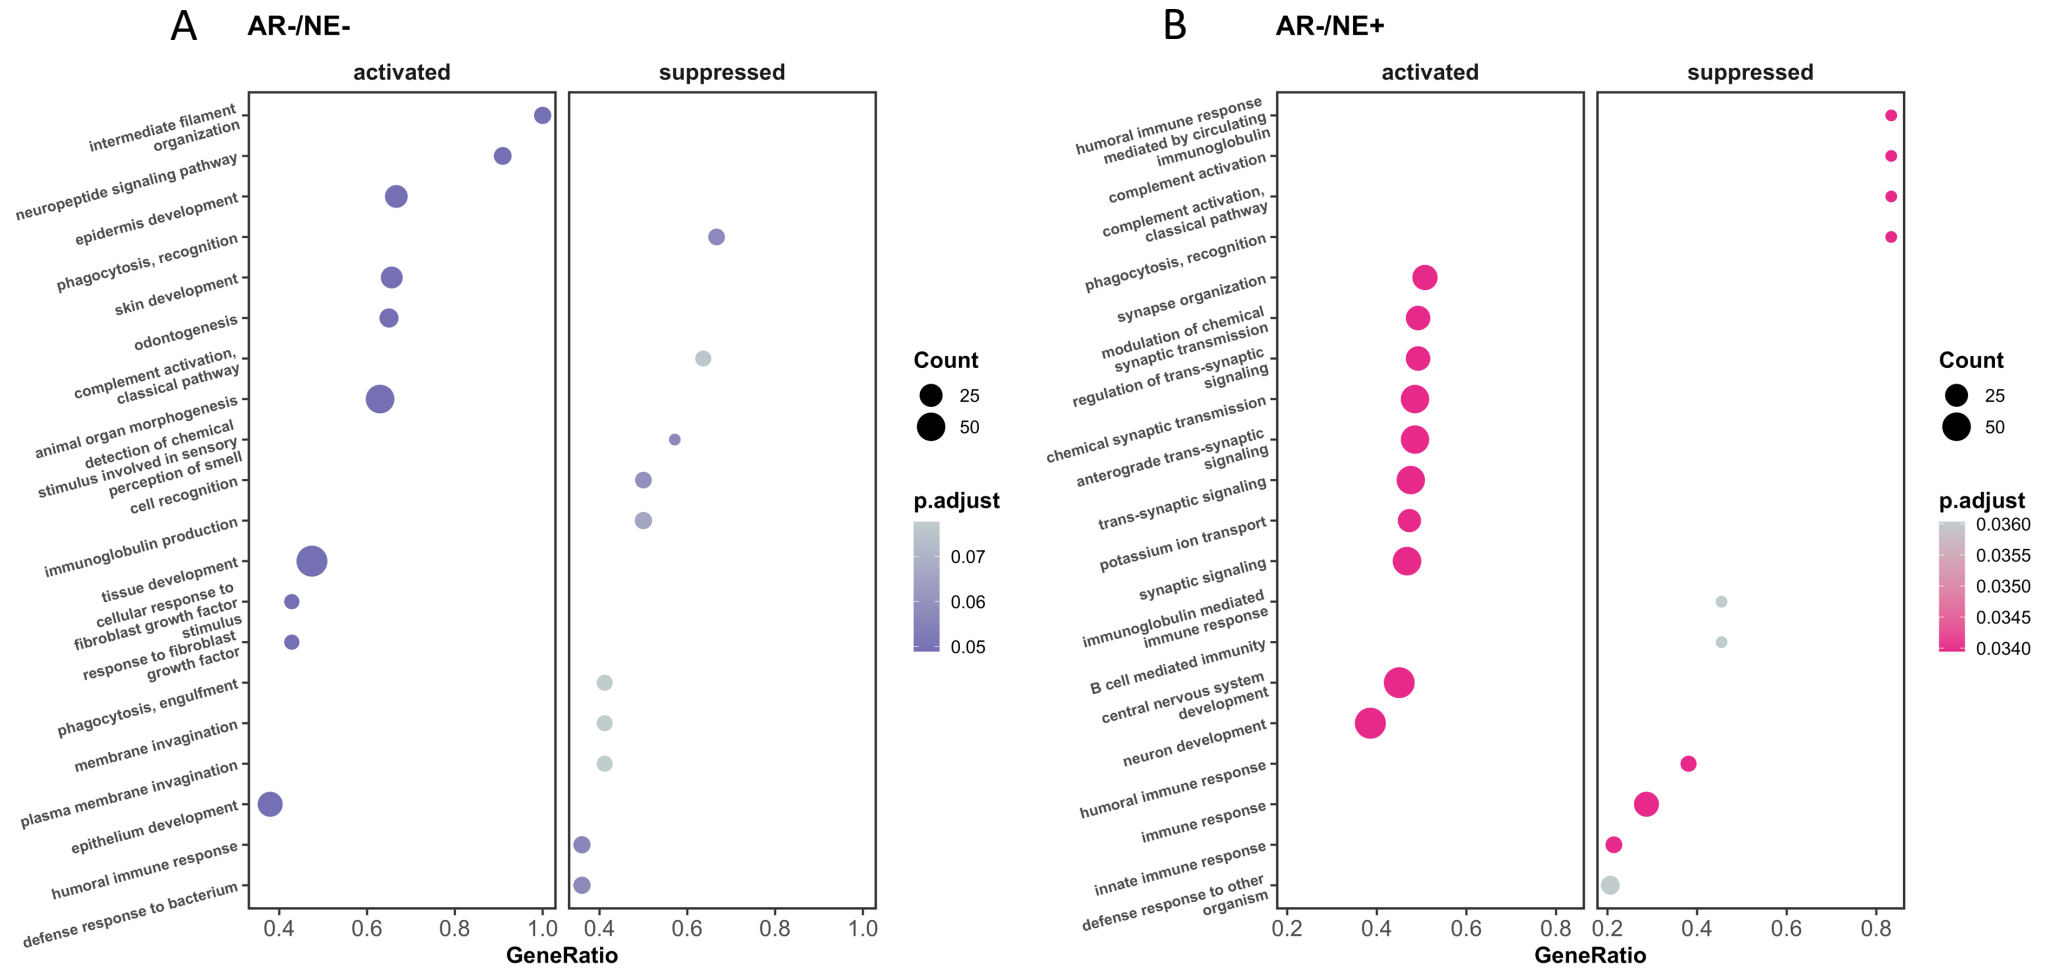

**Supplementary Figure 4. Gene Ontology (GO) with Biological processes (BP) on the genes uniquely up- or down-regulated within each subtype.**

Balloon plots representing the GO with BP on the genes that are uniquely up- or down-regulated in A) AR-/NE- and B) AR-/NE+ tumors. The color density indicates the adjusted p values and the size of circles shows number of genes contributed to each BP. X-axes show the “gene ratio”, a percentage of total differentially expressed genes in the given GO term. p.adjust: Adjusted p values using Benjamini-Hochberg (FDR) method.
