# Supplementary material for: The Genomic and Epigenomic Landscape of Double-Negative Metastatic Prostate Cancer
Source: PubMed Central journal article supplement — Cancer Res. 2023 Jun 8;83(16):2763–74. doi: 10.1158/0008-5472.CAN-23-0593 (PMC10425725; doi:10.1158/0008-5472.can-23-0593), 2023-06-08
Supplement: can-23-0593_supplementary_figure_5.suppsf5.pdf [file can-23-0593_supplementary_figure_5.suppsf5.pdf]

## Supplementary Figure 5.

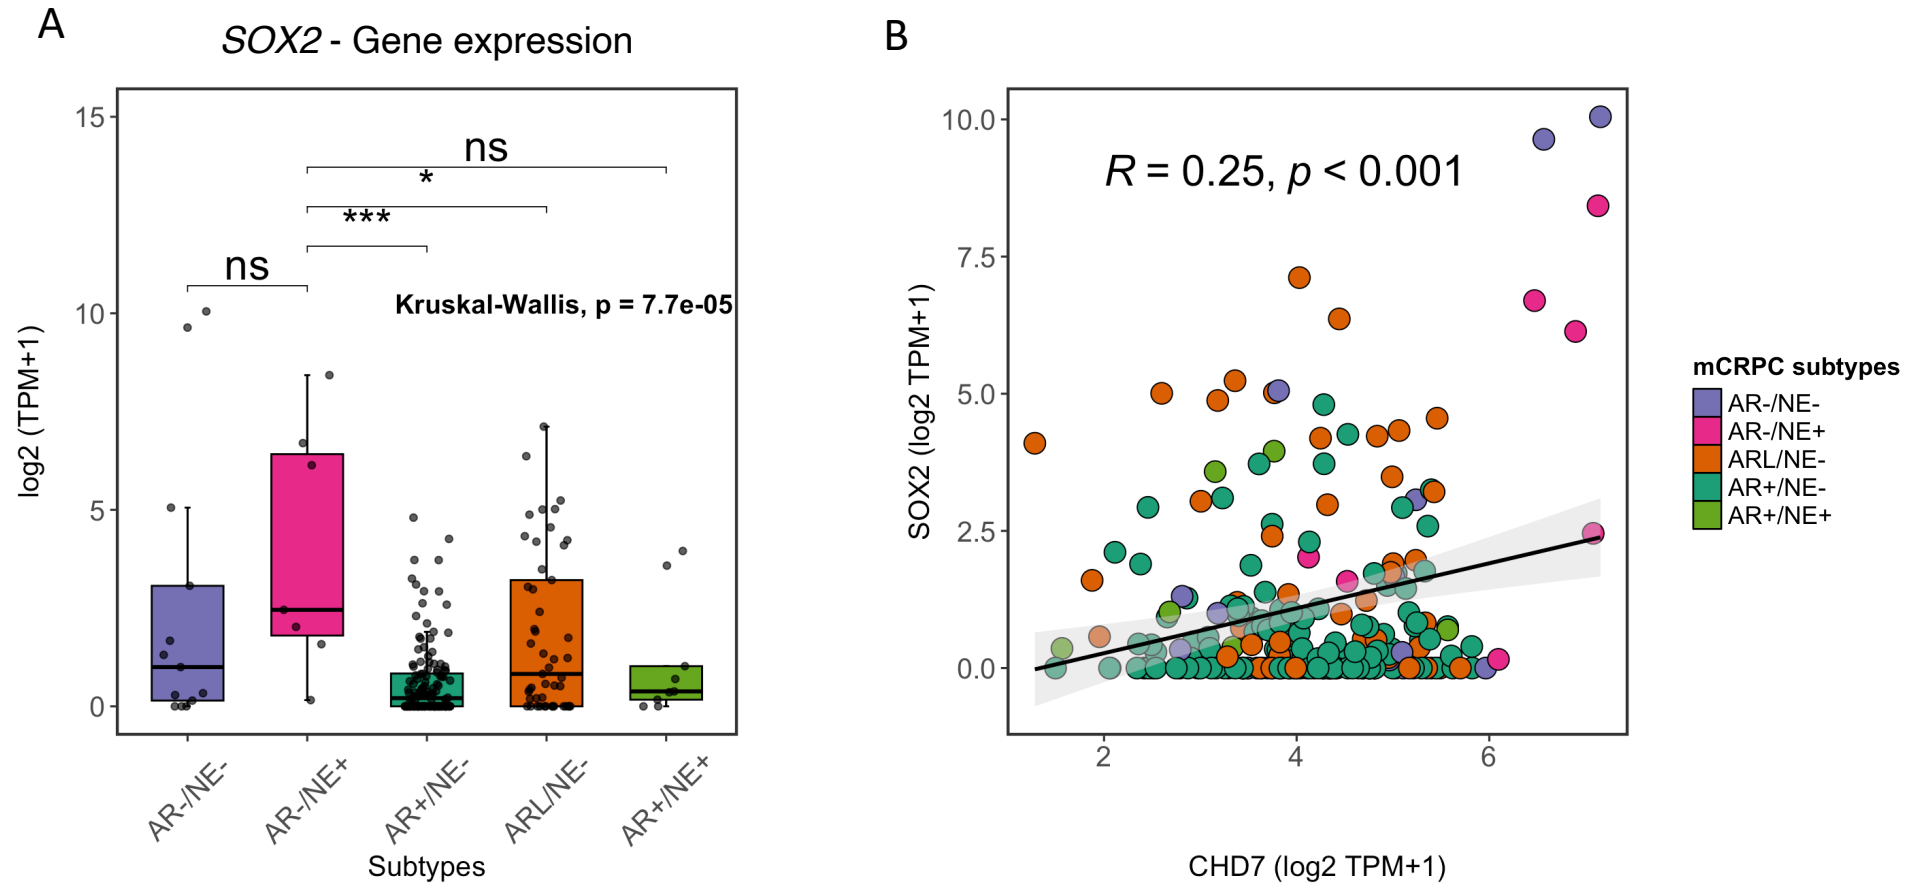

**Supplementary Figure 5. Gene expression level of *SOX2* among the tumor subtypes of WCDT samples.**

A) Boxplots representing the gene expression level of *SOX2* in log<sub>2</sub> (TPM+1). B) Scatterplot representing Pearson's correlation between *SOX2* gene expression and *CHD7* gene expression. Horizontal lines in boxplots denote median values; boxes extend from the 25<sup>th</sup> to the 75<sup>th</sup> percentile of each group's distribution of values; vertical extending lines denote adjacent values (the most extreme values within 1.5 interquartile range of the 25<sup>th</sup> and 75<sup>th</sup> percentile of each group). Significance is indicated as follows in the figures: ns not significant \* $p \leq 0.05$ ; \*\*  $p \leq 0.01$ ; \*\*\*  $p \leq 0.001$ .  $p$  values were adjusted using Benjamini-Hochberg (FDR) method.
