# Supplementary material for: The Genomic and Epigenomic Landscape of Double-Negative Metastatic Prostate Cancer
Source: PubMed Central journal article supplement — Cancer Res. 2023 Jun 8;83(16):2763–74. doi: 10.1158/0008-5472.CAN-23-0593 (PMC10425725; doi:10.1158/0008-5472.can-23-0593), 2023-06-08
Supplement: can-23-0593_supplementary_figure_6.suppsf6.pdf [file can-23-0593_supplementary_figure_6.suppsf6.pdf]

## Supplementary Figure 6.

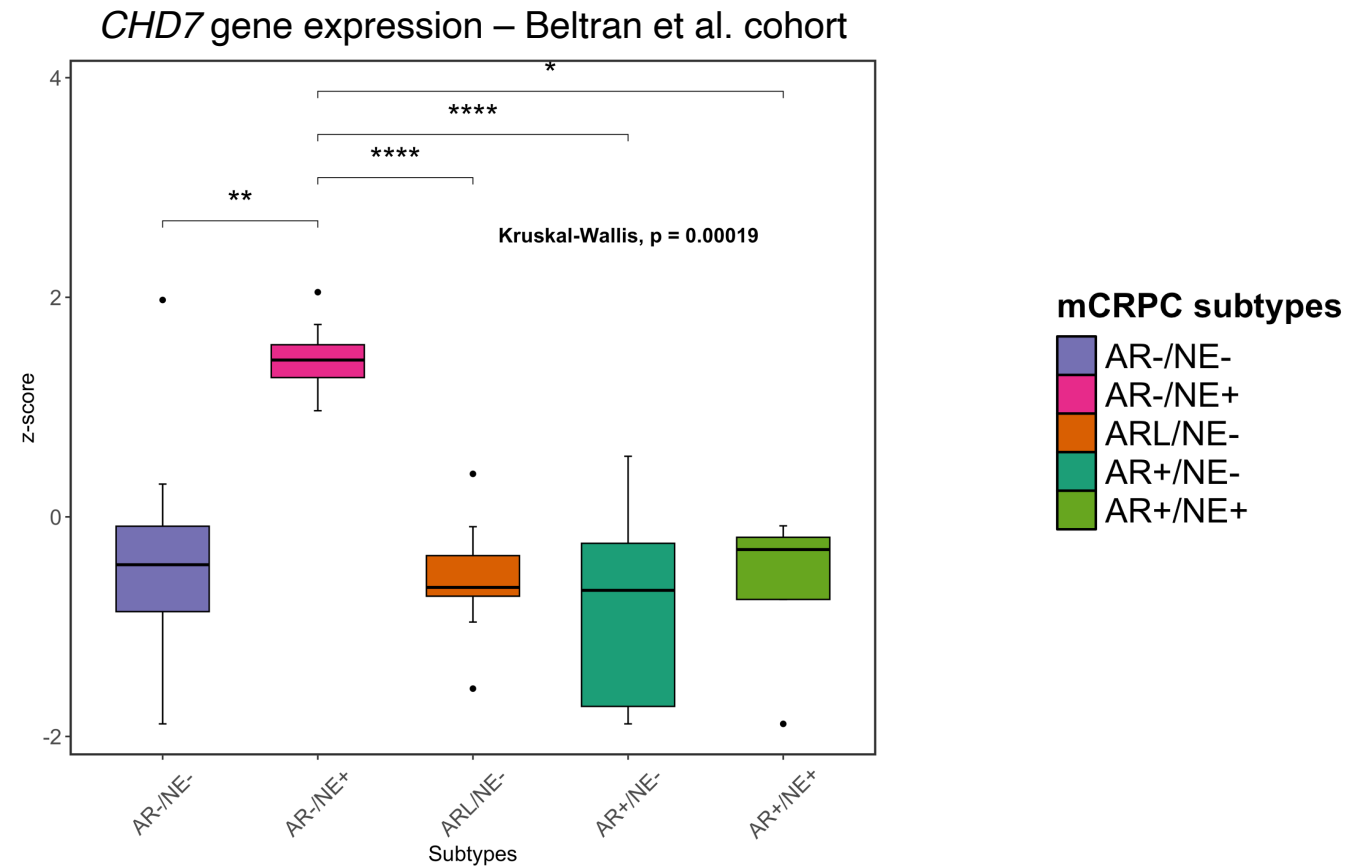

**Supplementary Figure 6. Gene expression level of *CHD7* among the mCRPC tumors of Beltran et al. cohort<sup>7</sup>.**

A) Boxplots representing the gene expression level of *CHD7* in z-score. Horizontal lines in the boxplots denote median values; boxes extend from the 25<sup>th</sup> to the 75<sup>th</sup> percentile of each group's distribution of values; vertical extending lines denote adjacent values (the most extreme values within 1.5 interquartile range of the 25<sup>th</sup> and 75<sup>th</sup> percentile of each group). Significance is indicated as follows in the figures: ns not significant; \* $p \leq 0.05$ ; \*\* $p \leq 0.01$ ; \*\*\* $p \leq 0.001$ , \*\*\*\* $p \leq 0.0001$ .  $p$  values were adjusted using Benjamini-Hochberg (FDR) method.
