# Supplementary material for: The Genomic and Epigenomic Landscape of Double-Negative Metastatic Prostate Cancer
Source: PubMed Central journal article supplement — Cancer Res. 2023 Jun 8;83(16):2763–74. doi: 10.1158/0008-5472.CAN-23-0593 (PMC10425725; doi:10.1158/0008-5472.can-23-0593), 2023-06-08
Supplement: can-23-0593_supplementary_figure_7.suppsf7.pdf [file can-23-0593_supplementary_figure_7.suppsf7.pdf]

# Supplementary Figure 7.

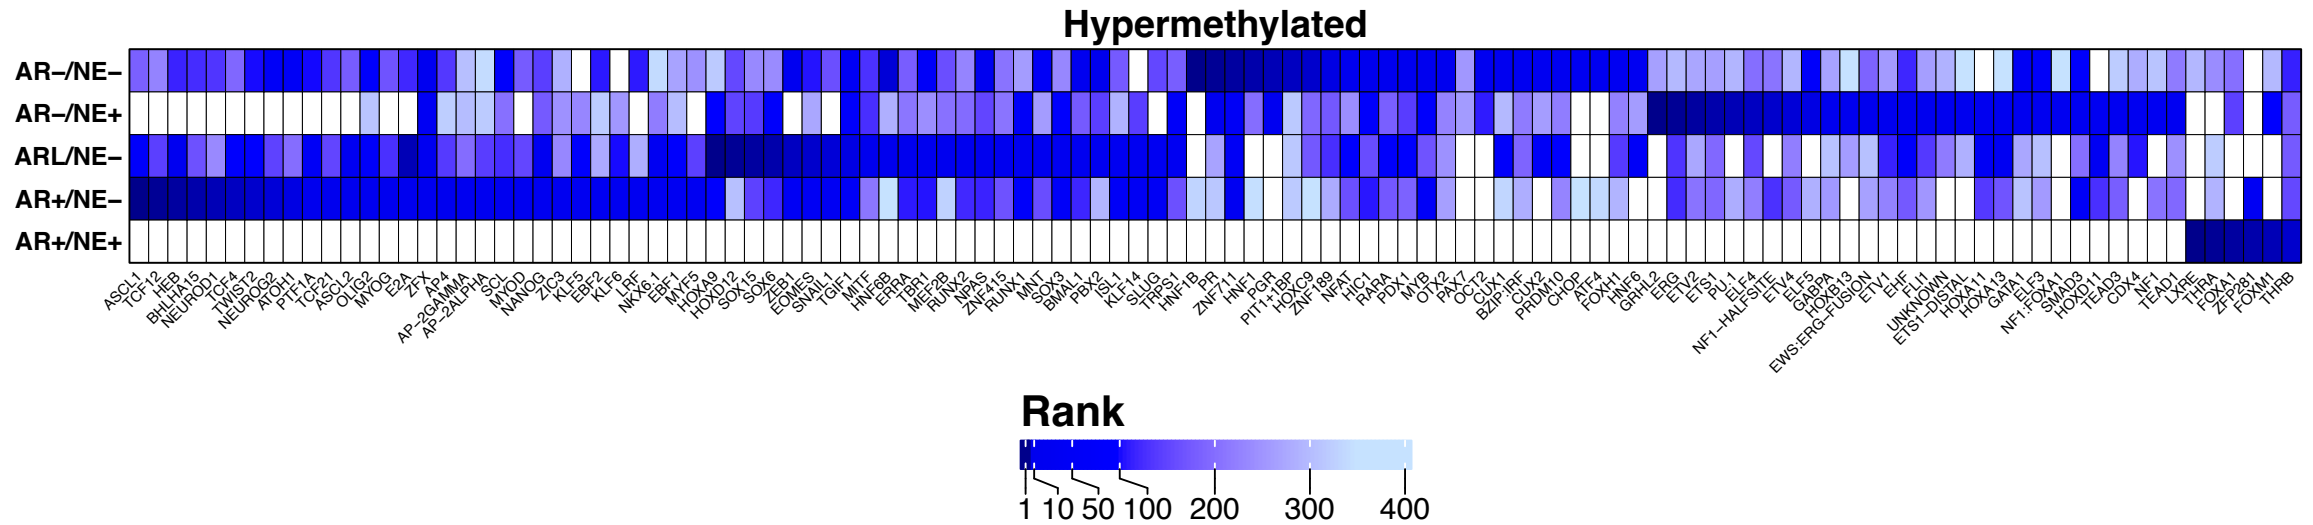

**Supplementary Figure 7. A heatmap representing the enrichment of transcription factors (TF) in hypermethylated regions of different subtypes of the WCDT samples.**

Heatmap representing the enrichment of TFs detected by HOMER<sup>34</sup> tool in the hypermethylated regions of different subtypes of WCDT samples. TFs were ranked by log (p-value). The color density indicates the rank of the TFs.
