# Supplementary material for: The Genomic and Epigenomic Landscape of Double-Negative Metastatic Prostate Cancer
Source: PubMed Central journal article supplement — Cancer Res. 2023 Jun 8;83(16):2763–74. doi: 10.1158/0008-5472.CAN-23-0593 (PMC10425725; doi:10.1158/0008-5472.can-23-0593), 2023-06-08
Supplement: can-23-0593_supplementary_figure_8.suppsf8.pdf [file can-23-0593_supplementary_figure_8.suppsf8.pdf]

## Supplementary Figure 8.

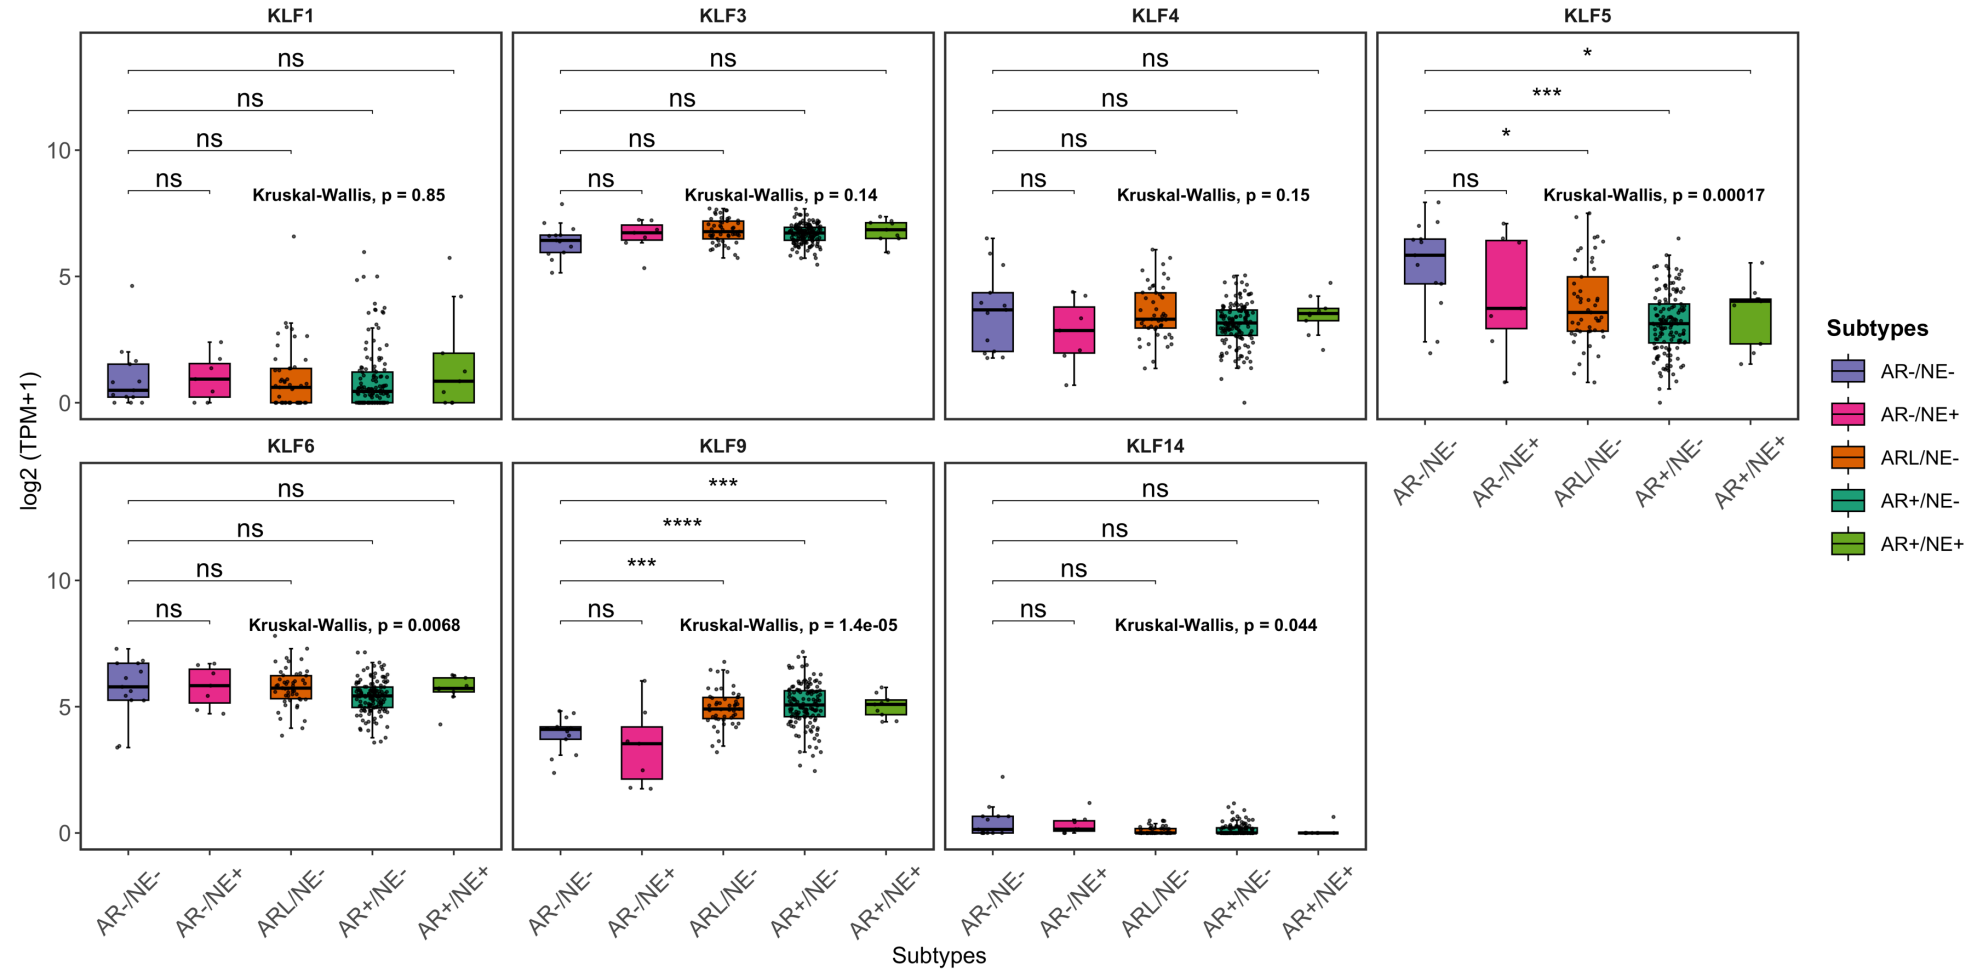

**Supplementary Figure 8. Gene expression level of Krüppel-like factor (KLF) family among the five mCRPC subtypes.**

Boxplots representing the gene expression level of KLF family transcription factors enriched in AR-/NE- tumors compared to other mCRPC subtypes. Boxplots should be interpreted as follows: horizontal lines denote median values; boxes extend from the 25<sup>th</sup> to the 75<sup>th</sup> percentile of each group's distribution of values; vertical extending lines denote adjacent values (the most extreme values within 1.5 interquartile range of the 25<sup>th</sup> and 75<sup>th</sup> percentile of each group). Pair comparisons between groups were assessed by the Student's T-test and adjusted for multiple testing (FDR). Significance is indicated as follows: ns not significant; \*  $p \leq 0.05$ ; \*\*  $p \leq 0.01$ ; \*\*\*  $p \leq 0.001$ ; \*\*\*\*  $p \leq 0.001$ .
